# Supplementary material
Source: publisher site journal article supplement (https://www.dovepress.com/article/423279)
Supplement: Supplementary file 1 [file get_supplementary_file.php]

**SUPPLEMENTARY MATERIALS**

**Supplementary Table 1 - Topic guide with prompts**

| **Subject Matter** | **Opening question** | **Sub-questions** | **Prompts** |
| --- | --- | --- | --- |
| Assessment  and  follow-up  of patients with COPD | How is COPD diagnosed in your GP practice? | - What do you understand by COPD? - What do you consider to be the typical characteristics of COPD? - Do you use guidelines for the diagnosis of COPD? | - What stages of COPD do you know? - Characteristics of the disease: - coughing - shortness of breath - sputum production - recurrent infections - smoking |
| Treatment | Which treatment do you prescribe to a COPD patient in your general practice? | - What treatment options do you know apart from pharmacotherapy? - If you advise smoking cessation, do you contact any smoking cessation centres or specialised healthcare professionals? - How were you informed about the different treatment options? - As COPD is a chronic disease, a cure is not an objective of the treatment. What do you try to achieve with the treatment you prescribe for your patient? | - Pharmacotherapy: - LAMA/LABA - SABA - Corticosteroids in case of exacerbation - Physiotherapy - Smoking cessation - Vaccination - Basic training - Post graduate training - Information disseminated. |
| Do you think that the financial situation of a patient also determines which treatment a COPD patient receives? | - Is the financial situation an obstacle to starting treatment in the field of pulmonary rehabilitation, pharmacotherapy and/or vaccination? |  |
| Respiratory physiotherapy and  Pulmonary Rehabilitation | What is your opinion about physical therapy and rehabilitation in the treatment of COPD? | - What do you know about this yourself? - Do you find it useful? - Do you prescribe this yourself? - Have you heard of airway clearance? | - Airway clearance techniques - Pulmonary Rehabilitation - Breathing techniques - Exercise training: - Strength - Endurance |
| Education and health-behaviour change | Has patient education been given its own role in the treatment plan of the COPD patient? | - What role do you play here as a GP? - If the patient has to use an inhaler, do you explain to the patient how to use it? - What do you think the patient thinks of this? - Do you think it is useful for the patient and/or treatment? | - Smoking cessation - Nutrition - Exercise - When do you check the correct use of the prescribed inhalers? - Do patients receive the information verbally or through a brochure? - About: - Physiopathology - Differential diagnosis - Prognosis - Risk Factors - Pulmonary Rehabilitation and Respiratory physiotherapy |
| Studies have shown that in order for behavioural change to be effective, there is a need for long-term follow-up and continuity of care. How do you feel about this? | - Is this followed up by the GP? - What does the patient think about this? - Does the GP do much in the way of prevention? |
| Patient compliance | How is the compliance of your patients? | - Do you feel that many of your patients follow their prescribed treatment? - Is there a difference in adherence between the different stages of COPD? - Do you find that there is more compliance after an exacerbation? |  |
| Interprofessional care | How about interprofessional care for these patients? | - Do you work together with other disciplines to optimise the care for COPD patients? - How do you organise the follow-up of your patient? - Is it possible to provide an individually adapted programme for each patient? | - Do you change the pharmacotherapy without consulting the respiratory physician? - Home nurse - Pulmonary Rehabilitation - When do you have a spirometry performed? - How do you communicate with other professionals? |
| Future | What do you think could be better in the future? | - What would need to change in your opinion to better help your COPD patient? - Are the guidelines sufficient and easy to use? - How can we stimulate the GP to prescribe more physiotherapy? | - Insufficient knowledge? - Cost of pulmonary rehabilitation? - Need for flyers? - Information platform? |

**Supplementary Table 2 - Coding framework**

| **Subject Matter** | **Code list** | **Sources** |
| --- | --- | --- |
| Assessment  and  follow-up  of patients with COPD | Start of diagnosis by anamnesis | 14 |
| Start of treatment on clinical basis before diagnosis by spirometry | 10 |
| Diagnosis by spirometry | 21 |
| If COPD is clinically suspected, suggest spirometry | 20 |
| GP performs spirometry | 7 |
| GP does not perform spirometry | 27 |
| Referral for lung function without consulting a respiratory physician | 7 |
| Patient characteristics: coughing | 21 |
| Patient characteristics: chronic problems | 15 |
| Patient characteristics: faster shortness of breath | 21 |
| Patient characteristics: history of smoking | 28 |
| Treatment | Knowledge of the various treatment options through basic training | 16 |
| Knowledge about the different treatment options through representative | 19 |
| Treatment goal for GP is quality of life | 23 |
| GP starts treatment himself | 16 |
| Do not adjust pharmacological treatment according to GOLD guidelines but according to patient’s symptoms | 10 |
| Respiratory physician gives suggestion for treatment | 14 |
| COPD patients are a high priority to receive influenza vaccine | 21 |
| Pneumococcal vaccine every 5 years | 19 |
| Patient admits not having enough money to pay for pharmacotherapy | 7 |
| GP takes cost of pharmacotherapy into account | 18 |
| Financial situation of patient influences treatment options | 18 |
| Respiratory physiotherapy and  Pulmonary Rehabilitation | GP does not know what airway clearance therapy is | 19 |
| Knowledge GP about respiratory physiotherapy: teaching breathing techniques | 13 |
| GP finds respiratory physiotherapy and pulmonary rehabilitation useful | 19 |
| GP does not often prescribe respiratory physiotherapy and pulmonary rehabilitation | 18 |
| Education and health-behaviour change | Check use of inhaler occasionally at consult | 18 |
| GP demonstrate use of inhaler when prescribed for the first time | 21 |
| Pharmacist demonstrates the use of the prescribed inhaler. | 13 |
| Patients often misuse their medication, including inhalers. | 14 |
| Refer patients to respiratory physician if in doubt or if case is difficult | 16 |
| Encourages patient to exercise more | 17 |
| Focus of behavioural change: enough exercise and stop smoking | 24 |
| Behavioural change through repetition | 25 |
| Behavioural change by scaring patient | 12 |
| Patients are difficult to motivate | 20 |
| People do not change their habits quickly. | 25 |
| Patient must also realise that part of the responsibility lies with him/her | 12 |
| Many patients do not quit smoking | 21 |
| Smoking cessation is important for GPs | 19 |
| Assess willingness to stop smoking though e.g., cycle of change by Prochaska and DiClemente | 17 |
| Referral to specialised healthcare professional for smoking cessation counselling | 12 |
| GP provides the smoking cessation counselling | 15 |
| No collaboration with specialised healthcare professional or centres for smoking cessation | 12 |
| Patient compliance | Patient uses inhaler because it quickly relieves their symptoms | 14 |
| Patient compliance varies between individuals | 14 |
| Once patients are fully recovered from their exacerbation, compliance drops again | 16 |
| Less compliance with fewer symptoms | 19 |
| Patient compliance increases as their symptoms worsen | 23 |
| Increasing patient’s compliance with pharmacotherapy by giving clear explanations | 13 |
| Interprofessional care | Interprofessional care can be improved, including communication | 10 |
| GPs have a central role in the continuity of care when patients are experiencing problems | 19 |
| Interprofessional care runs smoothly | 14 |
| Future | Achieving more behavioural change | 8 |
| Informing GPs through of seminars and symposia | 10 |
| More efforts to prevent smoking and raise awareness in people | 11 |
| Satisfied collaboration with the respiratory physician | 17 |
| Informing GPs better about all treatment possibilities regarding respiratory physiotherapy for patients with COPD | 22 |
| Reminding GPs about the option of respiratory physiotherapy | 16 |
| Starting treatment according to guidelines | 18 |
| Use of guidelines in diagnosing COPD | 14 |
| Choice of starting treatment depending on GOLD classification of patient. | 14 |
| Guidelines are easy and useful | 19 |
| Include evidence for respiratory physiotherapy in guidelines | 16 |

**Supplementary Table 3 - Checklist Standards for Reporting Qualitative Research (SRQR)***

|  |  |  |
| --- | --- | --- |
| **Title and abstract** | | **Page/line(s)** |
|  | **Title** - Concise description of the nature and topic of the study Identifying the study as qualitative or indicating the approach (e.g., ethnography, grounded theory) or data collection methods (e.g., interview, focus group) is recommended | Page 1 |
|  | **Abstract** - Summary of key elements of the study using the abstract format of the intended publication; typically includes background, purpose, methods, results, and conclusions | Page 2  Lines 32-55 |
|  |  |  |
| **Introduction** | |  |
|  | **Problem formulation** - Description and significance of the problem/phenomenon studied; review of relevant theory and empirical work; problem statement | Page 3  Lines 59-102 |
|  | **Purpose or research questio**n - Purpose of the study and specific objectives or questions | Page 4  Lines 107-109 |
|  |  |  |
| **Methods** | |  |
|  | **Qualitative approach and research paradigm** - Qualitative approach (e.g., ethnography, grounded theory, case study, phenomenology, narrative research) and guiding theory if appropriate; identifying the research paradigm (e.g., postpositivist, constructivist/ interpretivist) is also recommended; rationale** | Page 6  Lines 149-158 |
|  | **Researcher characteristics and reflexivity** - Researchers’ characteristics that may influence the research, including personal attributes, qualifications/experience, relationship with participants, assumptions, and/or presuppositions; potential or actual interaction between researchers’ characteristics and the research questions, approach, methods, results, and/or transferability | Page 5-6  Lines 134-147 |
|  | **Context** - Setting/site and salient contextual factors; rationale** | Page 4-5  Lines 112-122 |
|  | **Sampling strategy** - How and why research participants, documents, or events were selected; criteria for deciding when no further sampling was necessary (e.g., sampling saturation); rationale** | Page 5  Lines 124-131 |
|  | **Ethical issues pertaining to human subjects** - Documentation of approval by an appropriate ethics review board and participant consent, or explanation for lack thereof; other confidentiality and data security issues | Page 6  Lines 160-163 |
|  | **Data collection methods** - Types of data collected; details of data collection procedures including (as appropriate) start and stop dates of data collection and analysis, iterative process, triangulation of sources/methods, and modification of procedures in response to evolving study findings; rationale** | Page 6  Lines 133-158  Page 7  Lines 165-175 |
|  | **Data collection instruments and technologies** - Description of instruments (e.g., interview guides, questionnaires) and devices (e.g., audio recorders) used for data collection; if/how the instrument(s) changed over the course of the study | Page 6  Lines 149-158 |
|  | **Units of study** - Number and relevant characteristics of participants, documents, or events included in the study; level of participation (could be reported in results) | Page 6  Lines 133-158  See Table 1 |
|  | **Data processing** - Methods for processing data prior to and during analysis, including transcription, data entry, data management and security, verification of data integrity, data coding, and anonymization/de-identification of excerpts | Page 6-8  Lines 105-134 |
|  | **Data analysis** - Process by which inferences, themes, etc., were identified and developed, including the researchers involved in data analysis; usually references a specific paradigm or approach; rationale** | Page 6  Lines 133-158 |
|  | **Techniques to enhance trustworthiness** - Techniques to enhance trustworthiness and credibility of data analysis (e.g., member checking, audit trail, triangulation); rationale** | Page 6  Lines 133-158 |
|  |  |  |
| **Results/findings** | |  |
|  | **Synthesis and interpretation** - Main findings (e.g., interpretations, inferences, and themes); might include development of a theory or model, or integration with prior research or theory | Pages 7-12  Line 165-327 |
|  | **Links to empirical data** - Evidence (e.g., quotes, field notes, text excerpts, photographs) to substantiate analytic findings | Pages 7-12  Line 165-327 |
|  |  |  |
| **Discussion** | |  |
|  | **Integration with prior work, implications, transferability, and contribution(s) to the field -** Short summary of main findings; explanation of how findings and conclusions connect to, support, elaborate on, or challenge conclusions of earlier scholarship; discussion of scope of application/generalizability; identification of unique contribution(s) to scholarship in a discipline or field | Pages 12-16  Lines 329-430 |
|  | **Limitations** - Trustworthiness and limitations of findings | Pages 15-16  Lines 408-430 |
|  |  |  |
| **Other** | |  |
|  | **Conflicts of interest** - Potential sources of influence or perceived influence on study conduct and conclusions; how these were managed | Page 16  Line 447-448 |
|  | **Funding** - Sources of funding and other support; role of funders in data collection, interpretation, and reporting | Page 1  Line 30 |
|  |  |  |
|  | *The authors created the SRQR by searching the literature to identify guidelines, reporting standards, and critical appraisal criteria for qualitative research; reviewing the reference lists of retrieved sources; and contacting experts to gain feedback. The SRQR aims to improve the transparency of all aspects of qualitative research by providing clear standards for reporting qualitative research. |  |
|  |  |  |
|  | **The rationale should briefly discuss the justification for choosing that theory, approach, method, or technique rather than other options available, the assumptions and limitations implicit in those choices, and how those choices influence study conclusions and transferability. As appropriate, the rationale for several items might be discussed together. |  |
|  |  |  |
|  |  |  |
|  | **Note**: Adapted with permission from O'Brien BC, Harris IB, Beckman TJ, Reed DA, Cook DA. Standards for reporting qualitative research: a synthesis of recommendations. *Academic Medicine*, Vol. 89, No. 9 / Sept 2014. Available from: https://journals.lww.com/academicmedicine/fulltext/2014/09000/standards_for_reporting_qualitative_research__a.21.aspx. |  |
|  |  |  |
|  |  |  |
